# Supplementary material for: Presynaptic c-Jun N-terminal Kinase 2 regulates NMDA receptor-dependent glutamate release
Source: PubMed Central journal article supplement (PMC4357012; doi:10.1038/srep09035), 2015-03-12

## Supplementary Information

### Title: Presynaptic c-Jun N-terminal Kinase 2 regulates NMDA receptor-dependent glutamate release

Robert Nisticò<sup>1,8</sup>, Fulvio Florenzano<sup>1</sup>, Dalila Mango<sup>1,2</sup>, Caterina Ferraina<sup>1</sup>, Massimo Grilli<sup>3</sup>, Silvia Di Prisco<sup>3</sup>, Annalisa Nobili<sup>2,4</sup>, Stefania Saccucci<sup>5</sup>, Marcello D'Amelio<sup>2,4</sup>, Michela Morbin<sup>5</sup>, Mario Marchi<sup>3,6</sup>, Nicola B. Mercuri<sup>2</sup>, Roger J. Davis<sup>7</sup>, Anna Pittaluga<sup>3,6</sup> and\*Marco Feligioni<sup>1</sup>

**Supplementary Figure 1.** Presynaptic proteins and receptor subunit level during NMDA and L-JNKi1 treatment.

A) Representative western blot showing unchanged NMDA and AMPA receptor subunits protein levels upon NMDA (100  $\mu$ M) + glycine (1  $\mu$ M) and L-JNKi1 (2  $\mu$ M) treatment in wild-type mice cortical synaptosomes. B) Representative Western blot showing unchanged presynaptic protein, syntaxin 1a (STX1a), synapsin (SYN), MUNC18-1, SYT 1, protein levels upon NMDA and L-JNKi1 treatment in wild-type mice cortical synaptosomes. C) Representative Western blot showing JNK protein expression in JNK KO mice cortical synaptosomes. Anti-JNK shows the bands corresponding to JNK1 (46 and 54 kDa), JNK2 (46 and 54 kDa) and JNK3 (54 kDa).

WB shown are cropped and representative.

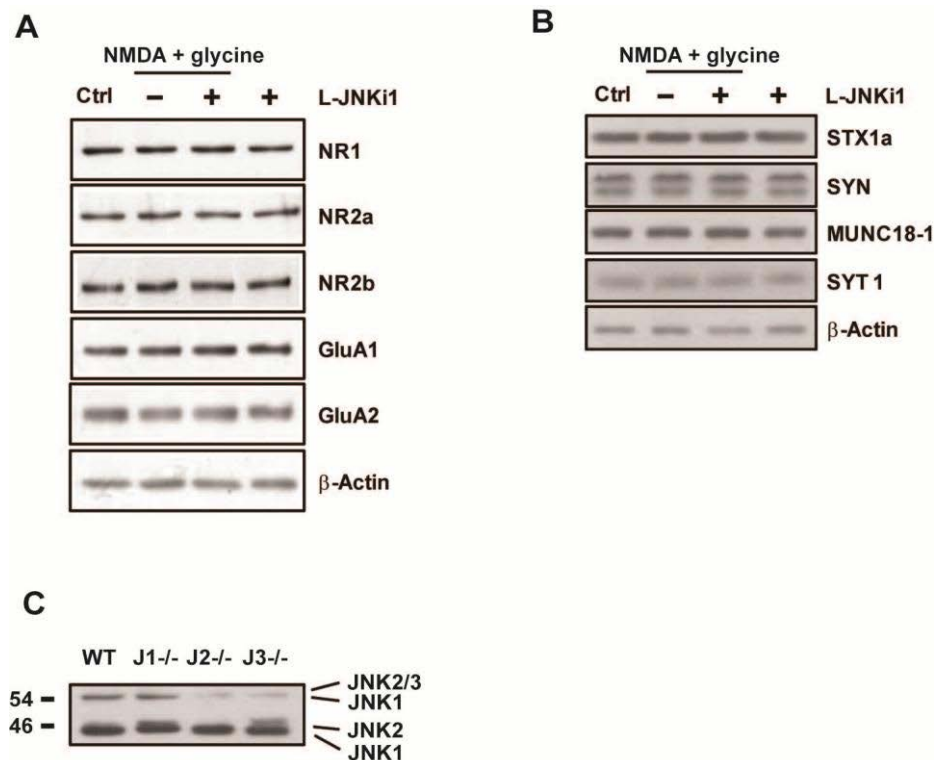

Supplement: srep09035-s1.pdf [file srep09035-s1.pdf]
